# Supplementary material for: Etiologic fraction of HPV-attributed anal and penile squamous cell carcinoma: study in specialized hospitals, Sri Lanka
Source: Research Square preprint supplement (doi:10.21203/rs.3.rs-6897768/v1), 2025-09-05
Supplement: Supplementary file 2 [file 796be50b193ed7d7408cdf19.docx]

Supplementary Table 1 -Frequency distribution of the sociodemographic factors among cases and controls

| **Characteristics** | **Group** | | | |
| --- | --- | --- | --- | --- |
| **Case** | | **Control** | |
| **No** | **%** | **No** | **%** |
| **Age category in years** |  |  |  |  |
| 30-39 | 1 | 5 | 4 | 5 |
| 40-49 | 1 | 5 | 4 | 5 |
| 50-59 | 8 | 40 | 45 | 56.3 |
| 60-70 | 10 | 50 | 27 | 33.8 |
| **Marital status** |  |  |  |  |
| Never married | 3 | 15 | 10 | 12.5 |
| Married (legally /customary) | 14 | 70 | 64 | 80 |
| Separated/divorced | 1 | 5 | 2 | 2.5 |
| Spouse died-widowed | 2 | 10 | 4 | 5 |
| **Religion** |  |  |  |  |
| Buddhist | 18 | 90 | 58 | 72.5 |
| Hindu | 0 | 0 | 1 | 1.3 |
| Roman Catholic | 1 | 5 | 19 | 23.8 |
| Christian | 1 | 5 | 2 | 2.5 |
| **Ethnicity** |  |  |  |  |
| Sinhalese | 19 | 95 | 75 | 93.8 |
| Tamil | 1 | 5 | 3 | 3.8 |
| Muslim | 0 | 0 | 2 | 2.5 |
|  |  |  |  |  |

Supplementary Table 2 – Frequency distribution of cases and controls by economic characteristics (n=20) and controls(n=80)

| **Characteristic** | | **Group** | | | |
| --- | --- | --- | --- | --- | --- |
| **Case** | | **Control** | |
| No | **%** | **No** | **%** |
|  | **Family Income USD** |  |  |  |  |
|  | <10,000 | 2 | 10.0 | 5 | 6.3 |
| 10,001-20,000 | 5 | 25.0 | 6 | 7.5 |
| 20,001-30,000 | 2 | 10.0 | 13 | 16.3 |
| 30,001-40,000 | 4 | 20.0 | 8 | 10.0 |
| 40,001-50,000 | 2 | 10.0 | 14 | 17.5 |
| >50,001 | 5 | 25.0 | 34 | 42.5 |
|  | **Current employment status** |  |  |  |  |
|  | Yes | 16 | 80.0 | 70 | 87.5 |
| No | 4 | 20.0 | 10 | 12.5 |
|  | **Level of education** |  |  |  |  |
|  | No schooling | 0 | .0 | 0 | .0 |
| Grade 1-5 | 6 | 30.0 | 4 | 5.0 |
| Grade 6-8 | 3 | 15.0 | 12 | 15.0 |
| Grade 9-GCE O/L completed | 9 | 45.0 | 31 | 38.8 |
| ***(****E0****)*** GCE A/L Completed | 2 | 10.0 | 23 | 28.7 |
| Technical | 0 | .0 | 2 | 2.5 |
| University or higher | 0 | .0 | 8 | 10.0 |
| **Total** | | **20** | **100** | **80** | **100** |

Supplementary Table 3- Frequency distribution of behaviuoral risk factors with HPV infection among respondents (n=20) and controls(n=80)

| **Characteristics** | | **Group** | | | | **Significance**  **OR&(95%CI)** |
| --- | --- | --- | --- | --- | --- | --- |
| **Case** | | **Control** | |
| **N** | **%** | **N** | **%** |
| **History of use tobacco** | | | |  |  |  |
|  | ***(****E0****)*** Never consume | 6 | 30.0 | 44 | 55.0 | χ2=4.00  df=1, p=0.046  OR=2.85(0.99-8.17) |
| Consume | 14 | 70.0 | 36 | 45.0 |
| **History of use alcohol** | | |  |  |  |  |
|  | ***(****E0****)*** Never consume | 5 | 25.0 | 23 | 28.7 | χ2=0.11  df=1, p=0.74  OR=1.21(0.39-3.72) |
| Consume | 15 | 75.0 | 57 | 71.3 |
| **History of use illegal drugs** | | |  |  |  |  |
|  | ***(****E0****)*** Never consume | 16 | 80.0 | 77 | 96.3 | P=0.01*  OR=6.42(1.31-31.49) |
|  | Consume | 4 | 20.0 | 3 | 3.8 |
|  | **Total** | **20** | **100.0** | **80** | **100.0** |  |

***(****E0****) non exposure*** ****exact significanc******e***
